# Supplementary material for: Connecting CSR theory and LPJmL 5.3 to assess the role of environmental conditions, management and functional diversity for grassland ecosystem functions
Source: Copernicus journal article supplement (doi:10.5194/bg-2023-55), 2023-04-12
Supplement: Supplementary file [file bg-2023-55-AC1-supplement.pdf]

1 **General evaluation of the research paper**

2 The paper presented by the authors addresses a very relevant and important topic in the field  
3 of DGVM model development. For far too long, the representation of grasses and the  
4 herbaceous layer have been given far too little focus in most DGVMs with respect to  
5 structural and functional diversity. Only recently, development of more detailed grass layer  
6 representations in DGVMs are starting to emerge but compared to tree-layer representation  
7 this work is still at a comparatively early stage of development. Grassland ecosystems and  
8 savannas cover a substantial fraction of the land surface and provide important ecosystem  
9 functions and services to a multitude of people while simultaneously being threatened by the  
10 effects of climate change and resource over-exploitation. Therefore, developing vegetation  
11 models that are capable of representing within-grass layer dynamics, diversity and processes  
12 is crucial to assess the impact of different management strategies and environmental change. I  
13 therefore deem the paper a relevant and important scientific contribution.

14 The CSR theory is a widely known concept and therefore a valid approach to implement  
15 functional diversity and trade-offs within the herbaceous layer of the model. One may  
16 question whether the implementation in its current form using a Bayesian calibration method  
17 to parameterize the new PFTs for three specific sites can be generalized for large-scale  
18 application, but in the given context of the study, the approach seems sound and justified to  
19 me. The shown results in many cases match ecological expectations and improve results  
20 compared to the old model version, further corroborating the chosen approach.

21 The paper is well-written and clearly structured. I therefore recommend publication pending  
22 minor revisions and clarifications detailed below.

23 We cordially thank the reviewer for their thorough and constructive feedback as well as the  
24 positive evaluation of our manuscript.

25 Below we provide a response to all detailed comments including proposals to achieve the  
26 suggested improvements.

27 **Detailed comments**

28 **Introduction:**

29 line(s) 36/37: You might also add the role of atmospheric CO<sub>2</sub>-concentration. CO<sub>2</sub>-  
30 fertilization effects can shift the competitive balance in grassland communities in locations  
31 where both C3 and C4 grasses are present.

32 We agree, even though we do not look into the effects of changing CO<sub>2</sub> concentrations it  
33 should be a part of this overview and we will add a brief description of its role.

34 line(s) 42: “high temperatures can lead to an increase of microbial decomposition”. Only in  
35 combination with sufficient moisture. In arid regions, decomposition comes more or less to a  
36 stand-still during the dry season due to the water limitation that affects the microbial  
37 community. Rains at the beginning of the wet season then lead to peak emissions when  
38 microbial decomposition picks up again.

39 We will add a phrase to highlight that moisture is a necessary condition independent of  
40 temperature.

41 line(s) 44/45 "...may be beneficial for grassland productivity depending on its intensity".  
42 Maybe add: "by removing moribund plant material and triggering growth (over-  
43 )compensation."

44 We will add the phrase the reviewer suggested.

45 line(s) 49: "for the species" – "for the functional types". I'd rather consistently keep the focus  
46 on functional types.

47 We agree and will make the amendments throughout the manuscript.

48 line(s) 52: "indirectly through alterations of the resource limitations" – add: "...that can cause  
49 shifts in the competitive balance between functional types".

50 We will add the phrase suggested by the reviewer.

## 51 **Methods**

52 line(s) 105: "hot-steppe pasture in South Africa": this is a somehow unusual terminology /  
53 vegetation classification. The Syferkuil site usually is referred to as savanna rangeland in  
54 other publications.

55 The terminology for the naming of all sites was derived from the Koeppen Geiger climate  
56 zones (in this case hot steppe). At the first mention we decided to add the form of grassland  
57 management (pasture). We therefore will keep the naming as is but will add a phrase pointing  
58 towards the term savanna rangeland in L105.

59 line(s) 107/108: That means no tests of fertilizer X defoliation intensity combinations? That  
60 could be another interesting experiment to add, at least for the simulations.

61 Thank you for this interesting suggestion. In this part of the manuscript, we only mention the  
62 managements for which experimental data were available and that could therefore be used to  
63 parameterize the sites. Not knowing experiments including fertilizer X defoliation  
64 combinations, we would be grateful for information and very interested to include such data  
65 and combinations in further studies. The additional scenarios are described in 2.5. With this  
66 separation we distinguish between the scenarios that were predefined by the data and those we  
67 selected for further analysis. When defining the scenarios for further analysis, we decided to  
68 use extreme cases to test the effect of different limiting resources (e.g. infinite nutrient  
69 availability) instead of choosing different fertilizer levels. Regarding the defoliation intensity,  
70 we agree that analyzing a gradient of different intensities provides another interesting  
71 experiment. However, we decided to put our main focus on the resources and believe that the  
72 defoliation intensities of the experiment already cover a sufficient range.

73 line(s) 115/116: Are the trait values you use to describe the strategies from within a  
74 continuous range, or discrete fixed values? For example, if you use SLA as a trait to  
75 distinguish between acquisitive and conservative strategies, then you will automatically cover  
76 the extremes as well as in-betweens if you allow SLA to be a continuous trait that can range  
77 between a minimum and maximum value (see, e.g., Scheiter et al., 2013, Langan et al., 2017).

78 The reviewer raises a very interesting point. LPJmL-CSR follows the concept of using a small  
79 number of PFTs with fixed parameters. Therefore, for example SLA is fixed and each PFT

80 only covers one point of the continuum. We also see the potential for interesting future work  
81 following an individual based approach drawing trait values from a continuum similar to LPJ-  
82 FIT (Sakschewski et al., 2015) or aDGVM2 (Scheiter et al., 2013). However, the currently  
83 implemented management routines of such models are less detailed compared to “classic”  
84 DGVMs that include an agricultural component. We therefore see the necessity to continue to  
85 improve grassland representation in both model types for the foreseeable future.

86 [line\(s\) 120 “Overview of managed grasslands in LPJmL” – “Overview of managed grassland](#)  
87 [representations in LPJmL” seems a more fitting title for this section.](#)

88 We will adopt the recommendation of the reviewer.

89 [line\(s\) 123/124: one polar, one temperate and one tropical grass: C4-type photosynthesis for](#)  
90 [the tropical grass? Knowing classic LPJ, I deem it likely that this is the case, but good to](#)  
91 [mention explicitly.](#)

92 We thank the reviewer for pointing this out. Indeed the tropical grass is a C4-type and we  
93 accept their proposal to explicitly mention this here.

94 [line\(s\) 130/131: \(no water limitation, ref\). – forgot to add the actual reference here.](#)

95 We will add the reference to Jägermeyr et al., (2015) describing the water management  
96 routines.

97 [Table 1: Forage supply \[MgDM ha-1\]: Terminology not entirely clear: Peak standing](#)  
98 [biomass? Annual withdrawal quantity \(through mowing / grazing\)? What is the temporal](#)  
99 [reference frame – annual?](#)

100 We will change the unit to MgDM ha-1 yr-1 and add a phrase defining forage supply as  
101 annual quantity removed through defoliation from mowing or grazing.

102 [line\(s\) 166-168: Does this new scheme also account for root biomass distribution in different](#)  
103 [soil layers, and therefore varying water availability between different soil layers? So that the](#)  
104 [total water uptake is the biomass-weighted uptake sum across soil layers? Or is it simpler than](#)  
105 [that?](#)

106 We thank the reviewer for pointing out that this could be described more clearly. Root  
107 distribution between different soil layers was already used to determine the water supply from  
108 the different layers in the previous model version (Schaphoff et al., 2018). Our scheme retains  
109 this approach and only distributes the sum over the supply from all soil layers based on the  
110 root biomass. We will include this in the explanation of our approach.

111 [line\(s\) 186: I suppose that means that SLA as a trait is a PFT-specific constant? I.e., it cannot](#)  
112 [vary over the lifetime of individual, or between different individuals of the same PFT?](#)

113 Yes, it is a constant but as stated in our reply to a previous comment (L78-85), we agree with  
114 the reviewer that there is great potential in exploring the entire continuum.

115 [line\(s\) 191/192: Does LPJmL distinguish between forbs and grasses, and if so, how is this](#)  
116 [implemented? And for grasses: does it distinguish between C3 and C4 photosynthetic](#)  
117 [pathway? Is age-mortality the only reason for mortality, or are there other causes](#)

118 implemented as well (e.g., due to negative annual C-balance, due to water stress, due to fire,  
119 etc.)?

120 LPJmL does not distinguish between forbs and grasses and the herbaceous PFTs can include  
121 both. C3 and C4 photosynthetic pathways are distinguished and we will add a description in  
122 the methods section. In addition to age mortality, the model checks if a PFTs overall root or  
123 leaf biomass becomes negative and kills the respective PFTs. Excessive water stress from  
124 prolonged drought may be a cause of this. However, additional causes of mortality from water  
125 stress such as embolism (Jacobsen et al., 2019) as well as heat stress are not included. Fire on  
126 managed grassland has been implemented both as a disturbance (unpublished) and a  
127 management practice (Brunel et al., 2021) but is not considered here. We will extend the  
128 section on mortality to provide this additional information.

129 line(s) 193: “a biomass increase of the average individual dependent on the available area” –  
130 rephrase? “the area-specific biomass increase of the average individual”

131 Using “area-specific” as suggested by the reviewer is in our opinion less explicit since it does  
132 not define which area. We propose instead to replace “available area” with bare ground area.

133 section 2.3.3: general question on mortality: does the model distinguish between annual and  
134 perennial herbaceous PFTs? I.e., do you have a PFT with enforced death after one growing  
135 season? Enforcing annual types should implicitly strongly select for fast resource acquisition  
136 at the expense of durable structural components, and a strong focus on reproductive  
137 performance (see, e.g., Pfeiffer et al., 2019).

138 Currently, LPJmL does not explicitly distinguish perennial and annual PFTs and death is not  
139 enforced at any time. Implicitly, the establishment as well as the mortality rate control the life  
140 cycle of the PFT. High establishment and mortality rates lead to a fast turnover of the  
141 population. We see potential in explicitly distinguishing annual and perennial PFTs for  
142 example through constraining the period of establishment for annuals to the growing season.  
143 We will pick up on this in the discussion.

144 line(s) 197: “we retained the approach of establishing saplings instead of seeds” – I assume  
145 that refers to the tree PFTs? A bit unusual to refer to establishing grasses or herbs as  
146 “saplings”. I assume that you must have excluded tree PFTs from the simulations of the  
147 grassland sites, allowing grasses/forbs only? Otherwise, it is likely that a forest type or  
148 savanna type would have established as potential natural vegetation at least at the German and  
149 South African sites. You should add the information of how you handled the tree component  
150 of the model in the section where you describe your simulation protocol. Also clarify how  
151 establishment is done specifically for the grasses / herbaceous layer.

152 Indeed, only herbaceous PFTs are allowed to establish on managed grassland stands. We will  
153 add this to the model description. We agree with the reviewer that the term sapling is  
154 misleading in this context and will replace it with the term seedling throughout the  
155 manuscript. In addition, since this may create some confusion regarding the sapling LAI  
156 parameter, for which we have to keep the term, we will explain the origin of the parameter  
157 name and its purpose.

158 line(s) 199/200: So just to make clear that I understand correctly: the average individuals are  
159 clones, i.e., all of the same PFT, but you introduced the clone-concept to be able to account  
160 for PFT-specific reproduction aspects, such as seed numbers, germination rates, and seedling

161 survival probability? If so, you should make it clearer than it is currently. It goes in the  
162 direction of the problems faced by models that simulate actual, true individual plants and their  
163 reproduction and establishment.

164 The reviewer raises an important point here. Indeed, the concept of the average individual  
165 should be explained in more detail to prevent confusion with individual based approaches. We  
166 will add a section in the methods explaining that each PFT can be seen as a representative for  
167 a population with certain attributes that describe the population (e.g. number of average  
168 individuals, individual biomass). In addition, we will discuss our approach in comparison to  
169 an individual based approach to show advantages and disadvantages.

170 line(s) 203: age-dependent mortality: hard set (at a specific age), or based on an age-  
171 dependent likelihood? And: the age-dependency differs between the different strategy types?

172 Thank you for this comment. Actually neither is the case. Depending on the growth  
173 efficiency, the number of average individuals is reduced (Appendix A3 L745-753). Actual  
174 mortality is derived from the maximum mortality rate - which is the same for all strategy  
175 types - and the growth efficiency. The growth efficiency is dependent on SLA, which differs  
176 between the strategy types (Appendix A3 Eq. A10). We will extend the description in  
177 Appendix A3.

178 And what is the allowed maximum number of average individuals, and the maximum number  
179 of grass-layer PFTs that can now coexist within one grid cell?

180 We thank the reviewer for this question. It made us realize that we did not include this in  
181 Appendix A3. There is no hard maximum number of individuals. However, if the total  
182 number of individuals exceeds 250 /ind/m<sup>2</sup>, 5% of the individuals die. We will add a  
183 qualitative description in the method section and update the equations and explain the  
184 underlying reasoning in Appendix A3. The number of PFTs per grid cell is in theory not  
185 limited, however we decided to use one PFT for each main strategy for the purpose of this  
186 study. For future studies this number can be increased, however this will also increase the  
187 computation requirements. We will mention this in the model description.

188 line(s) 205/206: “It can be assumed that few individuals that maintain a high cover and  
189 biomass must be larger...” – I assume all individuals that are part of one PFT have the same  
190 size and biomass, given that you are still using the average individual concept? So, adding  
191 new young individuals will lower the size and decrease the age of all clone individuals within  
192 the PFT due to the averaging. But this implies that a strongly reproduction-oriented PFT  
193 strategy would automatically have a smaller average individual size, a young average age, and  
194 a larger number of clone individuals representing the PFT. This has implications for the age-  
195 dependent mortality, as highly reproductive strategy types are then less likely to reach the age  
196 where age-dependent mortality hits. Did you consider this aspect?

197 The reviewer raises an important point. We do not simulate the age of the average individual.  
198 Our implementation of mortality depends on the growth efficiency. This describes the change  
199 in carbon from photosynthesis and turnover per average individual compared to the average  
200 individual carbon pools. In this ratio, the number of average individuals cancels out and the  
201 key aspect is the GPP to turnover ratio, which should be smaller in older populations leading  
202 to a higher mortality. We will also include this explanation in the method section on the  
203 mortality.

204 Table 2: Maybe add a column that specifies the predominant gradient associated with the  
205 parameter. You mention it in the text of this section, but it would be helpful to also have it as  
206 a brief overview in the table. I find the distinction between biotic and abiotic dimension a bit  
207 arbitrary/confusing with respect of the definition. Referring directly to the respective gradient  
208 (stress gradient for biotic, disturbance gradient for abiotic) would seem more intuitive for me.

209 We will abandon the terminology abiotic and biotic gradient. When writing the original draft,  
210 we found that it provides a clear distinction between the parameters related to each gradient.  
211 However, as the reviewer correctly noted, this creates an additional layer of terminology to  
212 understand when reading the manuscript. For this purpose we will modify the manuscript to  
213 follow the terminology stress and disturbance gradient as proposed by the reviewer and add a  
214 column to the table.

215 Table 2: Hierarchy: How did you determine the hierarchy? Based on your expert assessment?

216 We will add a phrase stating that the qualitative hierarchy of the parameter values for each  
217 PFT was derived from expert assessment by all co-authors.

218 Table 2: Light extinction coefficient: Independent from SLA, or correlated? High-SLA leaves  
219 should have more transmission than low-SLA leaves.

220 We agree with the reviewer that transmissivity of single leaves and their SLA are correlated.  
221 However, we had to deal with the challenge that LPJml does not simulate multiple leaf layers  
222 and cannot distinguish between the transmission of single leaves and the entire vegetation  
223 layer. To account for the difference between leaf and entire vegetation transmission at least  
224 implicitly, here the light extinction coefficient is not a measure of the transmissivity of a  
225 single leaf. Instead it is the transmissivity of the entire vegetation layer of a PFT. Therefore,  
226 we assume that PFTs, which have a high SLA can still have a high light extinction if many  
227 high transmissivity leaves are stacked. In the current version of the manuscript this is only  
228 touched upon in the discussion (L663-666). We will describe this in more detail in the  
229 methods section.

230 Table 2: Maximum transpiration unit [mm] – if this is to be a rate, then the time part of the  
231 unit is missing. [mm/day]?

232 We will change the unit to [mm d<sup>-1</sup>]

233 line(s) 237/238: The root efficiency coefficient does affect the competitiveness between plants  
234 (biotic interaction), but it also relates to the stress gradient (abiotic) with respect to water  
235 uptake capacity. This is an example illustrating why using “biotic” and “abiotic” as  
236 dimensions is maybe not the best way to make the distinction.

237 We agree that there are cases where the distinction between biotic and abiotic is not so clear.  
238 As already proposed earlier (reply in L209-214) we will abandon the terms and only retain the  
239 terms stress and disturbance gradient.

240 line(s) 240/241: The light extinction coefficient describes the fraction of light intercepted by  
241 each additional leaf layer, right? As the amount of light that can transmit a leaf layer depends  
242 on the thickness of the leaf, one would expect  $k_{beer}$  to be correlated with SLA, which, unlike  
243  $k_{beer}$ , you define as abiotic dimension. It would be good if you sort this out more clearly.

244 We agree and refer to our proposal from the related comment in the reply in L220-229. We  
245 will also describe more clearly, which parameters play a role for the stress or the disturbance  
246 gradient or for both gradients.

247 line(s) 241/242: the leaf area index of a sapling represents the offspring size - What do you  
248 define as "offspring size"? The height of the offspring, or its starting biomass, or its projected  
249 foliar coverage? I'm not sure LAIsap is a good description of offspring size, as its meaning is  
250 rather vague without a clearer definition. Whether a seedling/sapling of given leaf biomass  
251 has a high or low LAI is a function of its SLA, so LAIsap for a given unit of leaf biomass  
252 essentially is nothing else as another way to refer to SLA.

253 In LPJmL, the leaf area index of a sapling is only used to calculate the sapling biomass using  
254 SLA. So instead of assuming a given leaf biomass, we assume a given SLA and calculate the  
255 leaf biomass. Using the same SLA, a higher sapling LAI is equal to a higher sapling biomass.  
256 We will change offspring size to offspring biomass and add an explanation of the relationship  
257 to SLA. We will also revise the discussion to reflect both SLA and sapling LAI when  
258 discussing offspring biomass.

259 Table 3: Flip order of columns "variable" and "site", as site is unique and variable is tied to  
260 site and non-unique.

261 We agree and will apply the proposed change.

262 line(s) 287/288: "the current representation of some processes within the model" – which  
263 processes specifically?

264 We here refer to section 4.1.2 where these processes are listed. We will change "some  
265 processes within the model" to "the processes, listed in sect. 4.1.2," and remove the reference  
266 to section 4.1.2 at the end of the sentence.

267 line(s) 299: 390 years - your spin-up duration? Did you add a transient simulation period after  
268 the spin-up (how long? For what time-period?). One can only guess based on the time-axis  
269 labeling in the figures that follow in the results section. Please specify this with some more  
270 detail.

271 We agree that additional information is needed. We first conducted a potential natural  
272 vegetation spin-up simulation of 30000 years followed by a spin-up including land use of 390  
273 years after which the transient simulation start. We will add this to the modelling protocol  
274 section.

275 Modelling protocol: What is the temporal resolution the CSR-model version runs on?  
276 Monthly, or daily?

277 All processes are executed on a daily time scale. We also compute the outputs on a daily  
278 timescale but aggregate to a monthly or annual resolution for some of the results. We will add  
279 a sentence on this to the modelling protocol.

280 How do you initialize community composition with respect to present PFTs and shares of  
281 PFTs at the beginning of the simulation? Based on the field-based observations? If so, how  
282 would you do it in a situation where you did not know the field situation of sites, e.g., for a  
283 large-scale or global simulation? (Question for the discussion, I guess).

284 Upon initialization, each PFT is established dependent on the respective establishment rate  
285 and biomass (derived from sapling LAI, SLA and leaf to root ratio). Therefore, initially a PFT  
286 with high values in both has a higher share in the community. However, if its strategy is not  
287 suitable this will change over time. This means, that no data on initial community  
288 composition or similar is needed. We will add this explanation to the model description.

## 289 **Results**

290 **Figure 1: Please specify temporal reference frame for panels a, d, and g - is it the annual sum**  
291 **(yield), the peak season leaf biomass (leaf biomass), the grazing period duration offtake**  
292 **(grazing offtake)?**

293 We will add a more thorough explanation in the caption.

294 **General question on all scenarios that included animal grazing: Is preferential grazing, i.e.,**  
295 **selection of more palatable over less palatable PFTs, accounted for by the new CSR model**  
296 **version? Unlike mowing or biomass removal by fire that is indiscriminate, biomass removal**  
297 **by herbivores can alter community composition quite substantially, especially under high**  
298 **grazing pressure. If preferential grazing is not yet implemented, this should be added as a**  
299 **limitation in the respective section of the discussion, and could be pointed out as a future need**  
300 **for development.**

301 The reviewer raises an important point. Indeed the current implementation (Rolinski et al.,  
302 2018) does not consider preferences for specific PFTs. We will briefly mention this when  
303 describing the model and add it to the section on future need for development.

304 **line(s) 365-368: Ecologically, the shift towards more investment into above-ground biomass**  
305 **(growth (over-)compensation) and towards a more resource-exploitative strategy**  
306 **(construction of “cheaper” leaves with reduced life duration is plausible. However, I do not**  
307 **see right away why the minimum canopy conductance should decrease due to grazing?**

308 We agree that the decrease of the minimum canopy conductance is unlikely to be related to  
309 grazing directly. More likely, the high and similar minimum canopy conductance of the  
310 ungrazed scenario (C0) is an artefact of the parameterization. All parameters can be assigned  
311 primary and secondary processes that they affect. The leaf to root ratio and the SLA are  
312 different in the two scenarios and act as a compensation of defoliation from grazing (primary  
313 process). However, to some extent these parameters also control access to and distribution of  
314 resources (secondary processes). In the ungrazed scenario, these do not need to be adjusted to  
315 compensate for the defoliation but can still play a role in the competition for water. Therefore,  
316 more parameters can control resource access and distribution and it is likely that this will  
317 affect the parameterisation of minimum canopy conductance. We will amend the description  
318 of the parameters to account for the primary and secondary processes affected and add the  
319 explanation to the discussion.

320 **line(s) 406/407: How does the relative contribution of the S- and R-PFT to the forage supply**  
321 **compare to their relative abundance or relative contribution to FPC? I.e., did they contribute**  
322 **more or less than could be expected according to their relative abundance within the**  
323 **community?**

324 Thank you for the interesting question. We did not look into this in detail. Since biomass is an  
325 important variable when calculating FPC, we believe it is likely that forage supply and



326 growing season FPC are similar. However, there might be differences when averaging over  
327 the entire year. We will analyze our results regarding this and amend the manuscript if we  
328 discover additional interesting results.

329 line(s) 442/443: “In the irrigated scenario, only the S-PFT contributed to forage supply.” -  
330 That is a bit surprising? One would expect that irrigation reduces stress resulting from water  
331 limitation, therefore opening the community more strongly for the C-PFT.

332 This was also surprising and counterintuitive to us. We already provide an explanation in the  
333 discussion in L579-583, which we will now reference in the sentence in L442f.

334 line(s) 473/474: “...still dominated by the S-PFT.” - Is this a legacy effect from the pre-  
335 irrigation time period's community composition? If run long enough without resource  
336 limitation (i.e., with irrigation on), would the S-PFT type be replaced by the C-PFT type, and  
337 if yes, how long do you expect this would take? Can be part of the discussion, if not already  
338 discussed there.

339 We already touch upon this in L542-547 but agree that this can be discussed in more detail.  
340 We will add a reference in L473f and extend the discussion in section 4.1.2.

## 341 Discussion

342 General remark: how do you intend to use the CSR-model in the future, if you ideally need an  
343 a-priori determination of the ideal PFT parameterization depending on site, community, and  
344 management? And how can communities respond to changing management or environmental  
345 conditions if the parameterization of the PFTs cannot be dynamically adjusted during the  
346 simulation based on a selection mechanism that filters for the best-suited parameterization  
347 under the given circumstances?

348 The reviewer raises several interesting questions that go beyond this study. We are currently  
349 working on a globally applicable set of PFTs, which will form the basis of another study in  
350 the near future. For that study, we retain the fixed PFT parameterization of classic DGVMs.  
351 However, we are generally open and very much interested in further developing the model.  
352 As already mentioned in the reply in L78-85, it would be very interesting to combine the  
353 approach of LPJmL-CSR and aDGVM2 or LPJ-FIT.

354 line(s) 494/495: “IN LPJmL-CSR, growth of the vegetation was faster than in LPJmL 5.2,  
355 which led to higher yields for all cuts.” – Elaborate briefly on the causes for the faster growth  
356 in the new model version.

357 The faster growth compared to LPJmL 5 has two reasons: First, the new implementation of  
358 biological nitrogen fixation led to less nitrogen stress and higher photosynthesis. Second, this  
359 is also a result of the new parameterization, which was tailored to this site. We will add this  
360 explanation after L494f.

361 line(s) 504: “but selected a livestock density of 1.0 cows ha<sup>-1</sup>” – use “livestock units” rather  
362 than cows (how about steers, heifers, etc.); And: Is this to determine the amount of manure  
363 input? The temperate grassland was not grazed but mowed, so livestock density does not  
364 make much sense with respect to grazing off-take?

365 The livestock density refers only to the spin-up and the historical periods for which no data on  
366 actual land use were available. Therefore, it is entirely unrelated to the transient simulations  
367 that reproduce the mowing experiments. We will rephrase this paragraph to make this clear.

368 [line\(s\) 506: Briefly describe the processes / mechanisms that lead to increased carbon input to](#)  
369 [the soil in the CSR-version compared to the old version.](#)

370 We identified three causes for the increased carbon input: First, the SLA longevity trade-off  
371 we implemented led to an increase in turnover supplying more carbon to the litter layer.  
372 Second, implementing explicit mortality of average individuals created an additional input  
373 into the litter layer. Third, accounting for the carbon added through the application of manure  
374 fertilizer also constituted an additional carbon input into the system. We will add this  
375 explanation after L506f.

376 [line\(s\) 526/527: Here finally the information that I was missing in the methods section. You](#)  
377 [should add this information to the modeling protocol section \(that you did exclude the tree](#)  
378 [PFTs from your site-scale simulations.](#)

379 We will adopt this suggestion (see also reply in L152-157).

380 [line\(s\) 528/529: You should try to give a reason for the "why" of this, instead of simply](#)  
381 [repeating the result. For example, an explanation could be that grazing was not the only / the](#)  
382 [main stress for herbaceous vegetation at this savanna site. The site has a pronounced dry-vs-](#)  
383 [wet season dynamics, and therefore water limitation as a stress factor, maybe also N-](#)  
384 [limitation, may be causes for the dominance of the S-type irrespective of the grazing](#)  
385 [management.](#)

386 We agree with the reviewer that this should be explained and share their opinion of the  
387 underlying reasons. We will add a sentence to explain the dry wet dynamics of the site and  
388 that these are independent of grazing, which therefore does not affect the water stress level  
389 allowing the S-PFT to remain advantageous.

390 [line\(s\) 540/541: You could test this by specifically allowing no other PFT than the S-type to](#)  
391 [enforce a monoculture.](#)

392 We discussed the possibility to investigate this further, but decided against because LPJmL  
393 would limit us to simulating an S-PFT monoculture already before the beginning of the  
394 irrigation, which would likely lead to different initial conditions when starting irrigation. This  
395 would make it difficult to interpret the results.

396 [line\(s\) 544/545: Was your simulation time period with irrigation long enough to allow](#)  
397 [establishment of a new steady state with respect to community composition? In my](#)  
398 [experience, community composition shifts are one of the slower processes and can take quite](#)  
399 [a number of years before reaching a new steady-state after a change in forcing has occurred.](#)

400 We touch upon this in section 3.4.2 L475f by saying that “the transition occurred within the  
401 first one to two years”, which is much faster than we would expect. We mention this when  
402 discussing the change in soil organic carbon (L532-538) but we agree that this is very brief  
403 and will add more detail and highlight the transition time more prominently. We will also  
404 provide an explanation for the fast transition, which is related to the removal of competition  
405 for water. In a water scarce environment, the S-PFT as a water saver was advantageous and

406 the C- and R-PFT were subordinate. Under irrigation, the S-PFT's slow growth becomes a  
407 disadvantage and the C- and R-PFT can exploit resources more efficiently. Both increase their  
408 biomass rapidly until a different limitation prevents further increase, while the biomass of the  
409 S-PFT remains similar. This is comparable to real world ecosystems. However, existing  
410 individuals cannot grow infinitely and need to reproduce producing new individuals. This  
411 process of reproduction and dispersal may slow down the transition. In LPJmL, the PFTs  
412 increase their biomass independent from the establishment of additional individuals which  
413 speeds up the transition. We will add this explanation to the methods and discussion sections.

414 line(s) 545/546: "However, periods of drought can induce and additional disturbance." –  
415 Correct, but not in this case, because due to the irrigation you had drought eliminated.

416 The reviewer is correct. A plausible explanation is that the parameterization allows the R-PFT  
417 to coexist with the C-PFT if the main resource limitation is removed. We will update the  
418 explanation.

419 line(s) 549: "LPJmL 5.3 underestimated the observed forage supply..." – I'm not sure about  
420 your usage of the term "forage supply" (generally throughout the manuscript) - is forage  
421 supply, according to your definition, the potentially available biomass offered by the  
422 rangeland, or do you actually rather mean "the amount of feed required by the animals"  
423 (which should then be termed as "forage demand"?)

424 We agree that our use of forage supply was ambiguous because we use it to define the amount  
425 of biomass removed through mowing or grazing for the temperate grassland and the cold  
426 steppe but also for the amount of leaf biomass available for grazing for the hot steppe. This  
427 was an attempt to use common terms for all sites, which appears to be confusing instead of  
428 helpful. We will therefore change the term forage supply to forage offtake for the temperate  
429 grassland and the cold steppe and use the term leaf biomass for the hot steppe. We will add a  
430 definition of forage offtake in the methods section and explain why we use a different term  
431 for the hot steppe.

432 line(s) 552/553: I do not understand: how does feed demand change forage supply? Forage  
433 supply is a biomass potential offered by the plant community. Increased feed demand, as  
434 described here by your correction, should not increase the forage supply of the plant  
435 community (unless through growth overcompensation), but rather reduce the supply due to  
436 the increased demand from the animal side?

437 As in the previous comment we acknowledge that using the term forage supply creates some  
438 confusion and refer to our proposal to change this (reply in L424-431)

439 line(s) 554/555: The fact that animal demand could not be met AND above-ground biomass  
440 collapsed is a rather clear indication of over-grazing / exceeding of rangeland carrying  
441 capacity. In this context, maybe also discuss changes in the PFT community composition, i.e.,  
442 changes in the prevailing strategy types. It can be expected that such a shift in strategy types  
443 occurs under such circumstances.

444 We agree with the reviewer that the model results provide strong evidence for overgrazing  
445 and will add a phrase explicitly stating so. We will also add a sentence discussing the change  
446 in community composition which shows an increase of the C-PFT (and also to some extent  
447 the R-PFT) as shown in Fig SI 9 and 12.

448 line(s) 562/563: You did not combine fertilization with irrigation, right? Do you expect that  
449 fertilization in combination with irrigation would increase leaf biomass beyond the level  
450 reached with irrigation alone?

451 Generally, irrigation alone already affects processes related to inorganic N inputs and losses.  
452 Biological N fixation and mineralization increase with increasing soil moisture. However,  
453 irrigation also leads to higher leaching. We therefore expect that the PFTs are still N limited  
454 even though irrigation may already increase but could also decrease inorganic N availability.  
455 Additional inorganic N from fertilization may remove the N limitation leading to an  
456 additional leaf biomass increase but may also lead to higher maintenance respiration limiting  
457 leaf biomass growth. Therefore, we cannot give an unambiguous answer and will add this  
458 explanation in section 4.1.3.

459 line(s) 575: “Fertilization had no effect on SOC” – Not surprising, given that fertilization  
460 without irrigation did not increase leaf biomass and therefore C-input to the soil.

461 We agree with the explanation of the reviewer and will add this to the sentence.

462 line(s) 580/581: “it seems that an S-strategy remained advantageous” - Again, I wonder about  
463 the turnover time required by the model to let a community transition from one steady-state to  
464 a new steady-state.

465 While for the hot steppe we can provide clear evidence, that a new steady state was reached,  
466 for the cold steppe the reviewer raises an interesting point. Increased soil moisture from  
467 irrigation may lead to an increase of the NO<sub>3</sub> and NH<sub>4</sub> pools from mineralization and  
468 biological nitrogen fixation which may take longer than the simulated time frame (see also  
469 reply in L420-423). We will add this to the discussion.

470 line(s) 600: And it may be interesting how grass-tree coexistence (typical for savanna sites as  
471 the one one in South Africa) will affect grass layer community composition compared to a  
472 situation where trees are excluded from the simulation.

473 Indeed an improved representation of Savannahs would be a major step for DGVMs. In order  
474 to achieve this, we see the need for additional model development as discussed in Rolinski et  
475 al., (2021). We will add a sentence on this in the limitations and further need for research  
476 section.

477 line(s) 606/607: “Generally, a change in resource availability does only change the conditions  
478 for the establishment of a community but does not directly affect the established vegetation” –  
479 Environmental filtering can also affect the established community by increasing mortality for  
480 specific strategy types within the community, not only by changing establishment success of  
481 given strategy type. Since you seem to have no other mortality causes aside from age-  
482 dependent mortality in the model (at least not for the grass layer), you will not see this effect,  
483 but it does exist, nonetheless.

484 We agree with the reviewer and will extend this sentence to reflect the limitation of our model  
485 to age mortality and to discuss potential effects of other causes of mortality.

486 line(s) 614: Why are N-fixers not separate PFTs in the model? I'm a bit surprised that they are  
487 not.

488 Facing the challenge of adding new PFTs to a classic DGVM, our aim was to reduce  
489 complexity as much as possible at first. This included restricting ourselves to add as little  
490 PFTs as possible. Grouping N-fixers with non-fixers halved the number of PFTs. We believe  
491 this is reasonable because the model will only fix additional N if the demand is not fulfilled.  
492 In an approach with two separate PFTs, this would mean a change in community composition  
493 and an increase of the N-fixer PFT at the expense of the non-fixer. In our approach, this  
494 simply means an increase in biological nitrogen fixation. One could say, that implicitly the  
495 PFT is a fixer if needed and not if not needed and could determine this status using the  
496 biological nitrogen fixation output. We will add the necessary detail to the description of  
497 biological N fixation in Appendix A4.

498 line(s) 622/623: So the assumption is that grazing is non-preferential, correct? I.e., grazers do  
499 not favor one PFT over another, for example based on criteria that characterize palatability /  
500 nutrition value. This is a simplification in the model that should be discussed briefly, as  
501 herbivores usually do not function the same way as mowing (or fire) that removes biomass  
502 indiscriminately.

503 Yes, grazing is not preferential. As proposed in our reply in L301ff we will include this in the  
504 model description and include a brief discussion in the limitations.

505 line(s) 624: “tolerance or avoidance” – Avoidance would for example (aside from temporal  
506 avoidance) be realized by being unpalatable. As your grazing is non-preferential, being a  
507 grazing avoider type based on palatability would not make a difference in your model as the  
508 animals would not discriminate against the avoider. This is a limitation you should mention.

509 We thank the reviewer for raising this point and will include grazing avoidance through  
510 palatability in the limitations together with preferential grazing (reply in L503f).

511 line(s) 629/630: “... and the PFTs had to follow a grazing-tolerance strategy.” - The fact that  
512 grazing avoidance can only be achieved through life cycle adaptation and not through  
513 palatability likely causes a bias in your community composition. You should at least mention  
514 this possibility.

515 We thank the reviewer for their suggestion and will add a sentence on this at the end of the  
516 section (L631).

517 line(s) 632/633: “At the cold steppe site, grazing only happened during the growing season  
518 and both grazing tolerance and avoidance could be useful strategies.” – Well, likely not  
519 avoidance in the way you can represent it in the model (temporal avoidance). If grazing  
520 happens during the growing season, and your only way to implement avoidance is through life  
521 cycle adaptation, i.e., temporal avoidance, this will push avoiders to the non-growing season  
522 as time when no grazing happens. But I don't see how avoiders could succeed by shifting their  
523 existence focus to exactly the season when growth is not possible?

524 We will add a phrase acknowledging that the model will not be able to simulate the type of  
525 avoidance that is likely successful.

526 line(s) 643-645: This challenge could be circumvented by moving away from a PFT-concept  
527 with fixed pre-defined parameter values for each PFT, which implicitly limits the number of  
528 strategies that can be realized, for example by defining typical value ranges for the given  
529 parameters of a strategy type. Within these continuous ranges, a strategy type can assume

530 many trait value combinations that define its location within the trait space occupied by the  
531 strategy type, and therefore allows more plasticity within a strategy type, e.g., a plant could be  
532 a moderate, intermediate, or extreme S-strategy type.

533 We agree with the reviewer, that moving away from the fixed PFT approach is a suitable way  
534 to circumvent many of these issues. As discussed in previous comments one necessity is to  
535 follow an individual based approach as in aDGVM2 or LPJ-FIT. We see this as a promising  
536 and intriguing topic for future model development of LPJmL-CSR and will emphasize this  
537 more in the discussion.

538 line(s) 645/646: The challenge will be to expand this site-scale-focused approach to a  
539 generalized large-scale / global approach, because it will not be possible to parameterize  
540 suitable PFTs for all imaginable locations and circumstances. I think the value of what you  
541 show in this study is to prove that the CSR-concept can work within a DGVM and is  
542 ecologically sound in many points. But to make it general, you will have to move away from  
543 the discrete parameterization of your PFT approach, for example by allowing an evolutionary  
544 approach that self-selects successful strategies via environmental filtering from a pool of  
545 potential trait value combinations, where each trait is represented by a continuous range of  
546 allowed values.

547 The generalization for a global application indeed poses a challenge. However, for the tree  
548 PFTs, researchers managed to find a set for classic DGVMs that represents the broad range of  
549 environmental conditions possible. We believe that for herbaceous PFTs it will also be  
550 possible to find a suitable set that will improve the representation of grasslands in current  
551 DGVMs We hope to present this in a separate study in the near future. In the long term,  
552 additional model development including the step towards dynamic PFTs will further improve  
553 the representation of different growth strategies.

554 line(s) 664/665: I do not really agree with this approach. The light extinction coefficient (as I  
555 know it) is a constant that describes how much light a respective layer of leaves will absorb  
556 and how much it will allow to transmit to the next lower leaf level. As such, it is a proxy  
557 associated with leaf characteristics such as leaf thickness or SLA more than overall plant  
558 stature. If anything, I'd deem LAI closer to stature than the light extinction coefficient, if you  
559 do not have height available as state variable.

560 The reviewer is correct that the light extinction coefficient usually refers to the transmissivity  
561 of a leaf layer. In theory, this is represented as one leaf with a given height and SLA per layer.  
562 However, LPJmL and other classic DGVMs do not simulate different leaf layers but calculate  
563 the light extinction of the entire vegetation layer of one PFT. Therefore, the model actually  
564 calculates the light extinction of a stack of leaves. A larger stack of leaves will transmit less  
565 light and therefore has a higher light extinction coefficient compared to a smaller stack of  
566 leaves. Following this, the height of several leaf layers (or the vegetation layer) can be  
567 interpreted as a function of SLA and the light extinction coefficient. As mentioned in the  
568 discussion (L663-666) and previous work (Wirth et al., 2021) we think that this is a major  
569 limitation and believe that adding plant height as a state variable would be an important model  
570 development. As stated in our reply to the related comment in L218f we will improve the  
571 model description and refer to this in the discussion.

572 line(s) 674: In rangelands, mechanical stress through trampling would be another important  
573 aspect to consider.

574 Similar to the missing inclusion of preferential grazing (comment in L294-300), this is related  
575 to the representation of grazing. We will add trampling to the discussion of the limitations of  
576 the current grazing approach as well.

### 577 **Minor editorial comments**

578 We appreciate the thorough reading and will adopt all minor editorial comments below  
579 without responding to each of those separately.

580 line(s) 10: "... a temperate grassland, a hot and a cold steppe..." => "... a temperate grassland  
581 and a hot and a cold steppe..."

582 line(s) 13: at three grassland sites => at the three grassland sites

583 line(s) 17: Our results show, that => delete comma

584 line(s) 39: high carbon inputs => high carbon sequestration

585 line(s) 61: (examples) => delete, seems to be a leftover note from manuscript writing. Or  
586 alternatively replace with the examples you were thinking of...

587 line(s) 183: "recover slower" – "recover more slowly"

588 line(s) 184: "the SLA leaf longevity trade-off" – "the SLA v. leaf longevity trade-off"

589 line(s) 328: "While it remained similar..." – "However, it remained similar..."

590 line(s) 359 correct typo: resourCe

591 line(s) 420 contribute – contributed

592 line(s) 456: "we present results on above-ground biomass" – "we present results based on  
593 above-ground biomass"

594 line(s) 490: "this allows to assess" – "this allows assessment of", or "this allows assessing"

595 line(s) 496: we only assess – we only assessed

596 line(s) 533: "this can be explained with" – "this can be explained by"

597 line(s) 535: "and contributed to the litter layer" – "and increased the input to the litter layer".

598 line(s) 539: "In addition irrigation led to..." – "In addition, irrigation led to..."

599 line(s) 619: "...which constituted an additional investment." – Rephrase? "...and therefore, a  
600 reduction of investment costs associated with N-fixation."

601

602 Hyphenation of two-word combinations that are used in the function of an adjective:

603 line(s) 69: “disturbance prone environments” – “disturbance-prone environments”  
604 line(s) 73: “multi species communities” – “multi-species communities”  
605 line(s) 181 “stress prone ecosystems” – “stress-prone ecosystems”  
606 l- 203: “age dependent individual mortality” – “age-dependent individual mortality”  
607 line(s) 231 “plant specific resource availability” – “plant-specific resource availability”  
608 line(s) 249 “site specific conditions” – “site-specific conditions”  
609 line(s) 296: bias adjusted data” – “bias-adjusted data”  
610 line(s) 374, 375 “water saving strategy” – “water-saving strategy”  
611 line(s) 397 resource limited – resource-limited  
612 line(s) 473: “S dominated community” – “S-dominated community”  
613 line(s) 496: “neither water nor nutrient limited” – “neither water- nor nutrient-limited”  
614 line(s) 542, line(s) 543, line(s) 579 “S dominated” – “S-dominated”  
615 l- 580 “nutrient limited” – “nutrient-limited”

616

## 617 **References**

618 Scheiter, S., Langan, L. and Higgins, S.I., 2013. Next-generation dynamic global vegetation  
619 models: learning from community ecology. *New Phytologist*, 198(3), pp.957-969.

620 Langan, L., Higgins, S.I. and Scheiter, S., 2017. Climate-biomes, pedo-biomes or pyro-  
621 biomes: which world view explains the tropical forest–savanna boundary in South America?.  
622 *Journal of Biogeography*, 44(10), pp.2319-2330.

## 623 **References responses**

624 Brunel, M., Rammig, A., Furquim, F., Overbeck, G., Barbosa, H.M.J., Thonicke, K., Rolinski, S., 2021.

625 When do Farmers Burn Pasture in Brazil: A Model-Based Approach to Determine Burning  
626 Date. *Rangel. Ecol. Manag.* 79, 110–125. <https://doi.org/10.1016/j.rama.2021.08.003>

627 Jacobsen, A.L., Pratt, R.B., Venturas, M.D., Hacke, U.G., 2019. Large volume vessels are vulnerable to  
628 water-stress-induced embolism in stems of poplar. *IAWA J.* 40, 4-S4.

629 <https://doi.org/10.1163/22941932-40190233>

630 Jägermeyr, J., Gerten, D., Heinke, J., Schaphoff, S., Kummu, M., Lucht, W., 2015. Water savings  
631 potentials of irrigation systems: global simulation of processes and linkages. *Hydrol. Earth  
632 Syst. Sci.* 19, 3073–3091. <https://doi.org/10.5194/hess-19-3073-2015>

633 Rolinski, S., Müller, C., Heinke, J., Weindl, I., Biewald, A., Bodirsky, B.L., Bondeau, A., Boons-Prins,  
634 E.R., Bouwman, A.F., Leffelaar, P.A., te Roller, J.A., Schaphoff, S., Thonicke, K., 2018.



635 Modeling vegetation and carbon dynamics of managed grasslands at the global scale with  
636 LPJmL 3.6. *Geosci Model Dev* 11, 429–451. <https://doi.org/10.5194/gmd-11-429-2018>  
637 Rolinski, S., Wirth, S.B., Müller, C., Tietjen, B., 2021. Strategies for assessing grassland degradation,  
638 in: Joint XXIV International Grassland and XI International Rangeland Kenya 2021 Virtual  
639 Congress Oral Papers Proceedings. Presented at the Joint XXIV International Grassland and XI  
640 Rangeland Virtual Congress, Kenya Agricultural and Livestock Research Organisation, Nairobi,  
641 Kenya, pp. 383–387.

642 Sakschewski, B., Bloh, W. von, Boit, A., Rammig, A., Kattge, J., Poorter, L., Peñuelas, J., Thonicke, K.,  
643 2015. Leaf and stem economics spectra drive diversity of functional plant traits in a dynamic  
644 global vegetation model. *Glob. Change Biol.* 21, 2711–2725.  
645 <https://doi.org/10.1111/gcb.12870>

646 Schaphoff, S., Bloh, W. von, Rammig, A., Thonicke, K., Biemans, H., Forkel, M., Gerten, D., Heinke, J.,  
647 Jägermeyr, J., Knauer, J., Langerwisch, F., Lucht, W., Müller, C., Rolinski, S., Waha, K., 2018.  
648 LPJmL4 – a dynamic global vegetation model with managed land – Part 1: Model description.  
649 *Geosci. Model Dev.* 11, 1343–1375. <https://doi.org/10.5194/gmd-11-1343-2018>

650 Scheiter, S., Langan, L., Higgins, S.I., 2013. Next-generation dynamic global vegetation models:  
651 learning from community ecology. *New Phytol.* 198, 957–969.  
652 <https://doi.org/10.1111/nph.12210>

653 Wirth, S.B., Taubert, F., Tietjen, B., Müller, C., Rolinski, S., 2021. Do details matter? Disentangling the  
654 processes related to plant species interactions in two grassland models of different  
655 complexity. *Ecol. Model.* 460, 109737. <https://doi.org/10.1016/j.ecolmodel.2021.109737>  
656
